# Supplementary material for: Celastrol delays hepatic steatosis and carcinogenesis in a rapid AKT/c-Met-transfected hepatocellular carcinoma modelviasuppressing fatty acid synthase expression and AKT/ERK phosphorylation
Source: Royal Society of Chemistry journal article supplement (doi:10.1039/c8ra00522b), 2018-01-01

### Supplementary materials

**Figure S1** Macroscopic appearance and H&E staining (Scale bar: 100  $\mu$ m) of AKT/c-Met mouse livers at 4 weeks.

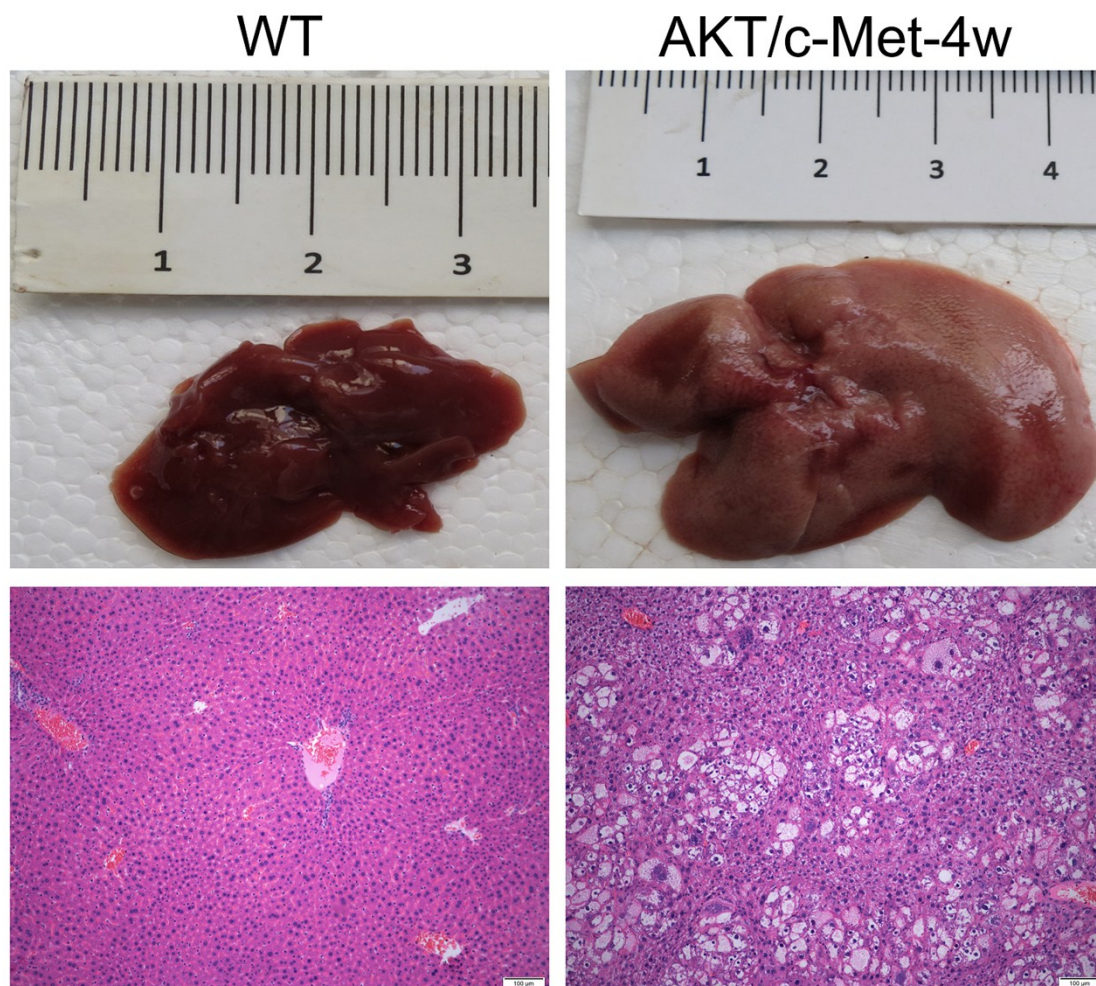

**Figure S2** No changes in liver weight were detected in Sorafenib (100 mg/kg) treated AKT/c-Met HCC. Sorafenib (100 mg/kg) or vehicle (70 % Cremophor/ethanol 3:1, 20 % PBS, and 10 % DMSO) was intraperitoneally injected daily for 3 weeks starting 4 weeks after AKT/c-Met construct injection for early stage AKT/c-Met HCC treatment.

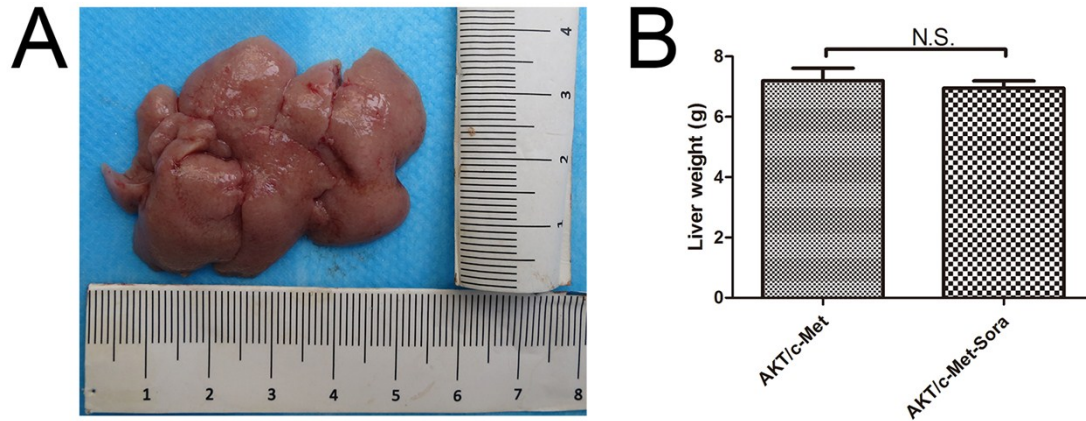

Supplement: c8ra00522b1.pdf [file c8ra00522b1.pdf]
